# Supplementary material for: Assessing the Effectiveness of SO 2 , NOx, and NH 3 Emission Reductions in Mitigating Winter PM 2.5 in Taiwan Using CMAQ Model
Source: Copernicus journal article supplement (doi:10.5194/egusphere-2024-343), 2024-04-18
Supplement: Supplementary file 1 [file egusphere-2024-343-supplement.pdf]

Supplementary Material for

5                    **Assessing the Effectiveness of SO<sub>2</sub>, NO<sub>x</sub>, and NH<sub>3</sub> Emission Reductions  
                         in Mitigating Winter PM<sub>2.5</sub> in Taiwan Using CMAQ Model**

by

10                   Ping-Chieh Huang<sup>1</sup>, Hui-Ming Hung<sup>1\*</sup>, Hsin-Chih Lai<sup>2</sup>, and Charles C.-K. Chou<sup>3</sup>

**Contents of this file**

15

Description of the relationship between  $S_{NO_x,NO_3}$  and NO<sub>2</sub> concentration

Tables S1 to S7

Figures S1 to S11

20 **Relationship between  $S_{NOx,NO_3}$  and  $NO_2$  concentration**

The reduction in  $NO_x$  emissions induces a decrease in  $NO_2$  concentration, leading to a subsequent reduction in  $HNO_3$  production through reaction R1.

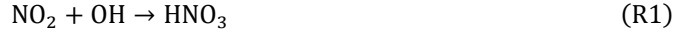

25 The production rate of  $HNO_3$  ( $P_{HNO_3}$ ) can be calculated with  $OH$  concentration assumed in the steady state as follows:

$$\frac{d[OH]}{dt} = P_r - L = P_r - \sum k_i[A]_i [OH] - k_{NO_2}[NO_2][OH], \quad (1)$$

where  $P_r$  and  $L$  are chemical production and loss of  $[OH]$ ,  $\sum k_i[A]_i [OH]$  is the sum of reaction rates of all  $OH$ -consuming chemical reactions except (R1),  $k_i$  is the rate constant of each reaction.

The steady-state  $[OH]$  is estimated as follows:

$$30 \quad [OH]_{SS} = \frac{P_r}{\sum k_i[A]_i + k_{NO_2}[NO_2]} \quad (2)$$

$$P_{HNO_3} = k_{NO_2}[NO_2][OH]_{SS} = \frac{P_r \times k_{NO_2}[NO_2]}{\sum k_i[A]_i + k_{NO_2}[NO_2]} \quad (3)$$

The total  $[HNO_3]$  is contributed by the chemical process ( $[HNO_3]_{chem}$ ) at a time frame of  $\Delta t$  and transported from outside the domain boundaries ( $[HNO_3]_{trans}$ ) as follows:

$$[HNO_3] = [HNO_3]_{chem} + [HNO_3]_{trans} = \frac{P_r \times k_{NO_2}[NO_2]\Delta t}{\sum k_i[A]_i + k_{NO_2}[NO_2]} + [HNO_3]_{trans} \quad (4)$$

35

As  $[NO_2]$  low enough,  $[HNO_3]_{trans}$  would become comparable with  $[HNO_3]_{chem}$  to affect the total  $[HNO_3]$ . With the simple assumption of  $[NO_2]$  proportional to the emission reduction rate, i.e.,  $[NO_2] = [NO_2]_{control\_run} \times Er$ , where  $Er$  is the emission ratio. With the assumption of  $P_r \times \Delta t = 3$  and  $\sum k_i[A]_i : k_{NO_2}[NO_2]_{control\_run} = 7 : 5$ , (the assumed variable values are applied to evaluate the influence

40 of transport term on the sensitivity,  $S_{NOx,NO_3}$ ). Figure S11 shows  $HNO_3$  concentration and  $S_{NOx,NO_3}$  in this condition with  $[HNO_3]_{trans} = 0, 0.2$ , and  $0.53$ , which represents no transported  $HNO_3$ , transported  $HNO_3$  equal to  $[HNO_3]_{chem}$  at  $NO_2 = 0.1$  and at  $NO_2 = 0.3$ .  $HNO_3$  increases as  $Er$  increases, but the increase gradually slows down. The variation in transported  $HNO_3$  does not alter the overall pattern of total  $HNO_3$ ; it only introduces differences in values (Fig. S11a). However, the trend of  $S_{NOx,NO_3}$  is different (Fig. S11b).

45 In the absence of transported  $HNO_3$ ,  $S_{NOx,NO_3}$  increases as  $Er$  decreases. Conversely, when  $[HNO_3]_{trans}$  is greater than 0,  $S_{NOx,NO_3}$  has a transition point, occurring at  $Er$ , corresponding to a  $[HNO_3]_{chem}$  similar to  $[HNO_3]_{trans}$ . The scatter plot of  $S_{NOx,NO_3}$  is calculated based on the six discrete points with an interval

of 0.2 to mimic the CMAQ simulation and shows a similar trend under the influence of non-zero  $[\text{HNO}_3]_{\text{trans}}$ .

50 **Table S1: WRF-CMAQ model setting.**

|                              | <b>Parameters</b>           | <b>Setting</b>                  |
|------------------------------|-----------------------------|---------------------------------|
| <b>WRF</b><br><b>v3.7.1</b>  | Microphysics                | WSM 5-class scheme              |
|                              | Cumulus Parameterization    | Kain-Fritsch                    |
|                              | Planetary Boundary Layer    | YSU scheme                      |
|                              | Surface Layer               | MM5 Monin-Obukhov scheme        |
|                              | Land Surface                | Unified Noah land-surface model |
|                              | Urban Surface               | No                              |
|                              | Longwave Radiation          | cam scheme                      |
|                              | Shortwave Radiation         | cam scheme                      |
|                              | SST_update                  | Yes                             |
| <b>CMAQ</b><br><b>v5.2.1</b> | Chemical mechanism          | Cb06                            |
|                              | Horizontal advection        | Yamo                            |
|                              | Vertical advection          | WRF input                       |
|                              | Horizontal mixing/diffusion | Multiscale                      |
|                              | Aerosol                     | Aero 6                          |
|                              | Cloud option                | ACM AE6                         |
|                              | Emission                    | TEDS 9.0                        |

**Table S2: WRF-CMAQ resolution.**

|             |                       | <b>D01</b> | <b>D02</b> | <b>D03</b> | <b>D04</b> |
|-------------|-----------------------|------------|------------|------------|------------|
| <b>WRF</b>  | <b>Vertical Layer</b> | 45         | 45         | 45         | 45         |
|             | <b>Grid size</b>      | 91×91      | 166×169    | 223×223    | 223×223    |
|             | <b>FDDA</b>           | Yes        | Yes        | Yes        | No         |
| <b>CMAQ</b> | <b>Resolution</b>     | 81km       | 27km       | 9km        | 3km        |
|             | <b>Vertical Layer</b> | 6          | 15         | 15         | 15         |
|             | <b>Grid size</b>      | 70×80      | 70×80      | 70×80      | 90×135     |

55 **Table S3: Box model initial conditions.**

| parameter                                        | value                       | Description <sup>*</sup>                                                                         |
|--------------------------------------------------|-----------------------------|--------------------------------------------------------------------------------------------------|
| <b>Temperature</b>                               | 291 K                       |                                                                                                  |
| <b>Cloud water</b>                               | 0.376 g kg <sup>-1</sup>    |                                                                                                  |
| <b>CO<sub>2(g)</sub></b>                         | 400 ppmv                    | Constant                                                                                         |
| <b>SO<sub>2(g)</sub></b>                         | 7.13 ppbv                   | <sup>b</sup> SO <sub>2(g)</sub> + <sup>c</sup> dH <sub>2</sub> O <sub>2</sub>                    |
| <b><sup>a</sup>H<sub>2</sub>O<sub>2(g)</sub></b> | 0.43 ppbv                   |                                                                                                  |
| <b><sup>b</sup>O<sub>3(g)</sub></b>              | 18.7 ppbv                   |                                                                                                  |
| <b>Total <sup>a</sup>NH<sub>3</sub></b>          | 73.4 ppbv × <sup>d</sup> Er | NH <sub>3(g)</sub> + NH <sub>4</sub> <sup>+</sup> (I+J+K)                                        |
| <b>Total <sup>a</sup>HNO<sub>3</sub></b>         | 12.3 ppbv                   | HNO <sub>3(g)</sub> + NO <sub>3</sub> <sup>-</sup> (I+J+K)                                       |
| <b>SO<sub>4</sub><sup>2-</sup></b>               | 0.088 μg m <sup>-3</sup>    | <sup>b</sup> SO <sub>4</sub> <sup>2-</sup> (I+J+K) – <sup>c</sup> dH <sub>2</sub> O <sub>2</sub> |
| <b><sup>a</sup>Fe<sup>3+</sup></b>               | 0.0238 μg m <sup>-3</sup>   | Fe(III) available for sulfate oxidation                                                          |
| <b><sup>a</sup>Mn<sup>2+</sup></b>               | 0.035 μg m <sup>-3</sup>    | Mn(II) available for sulfate oxidation                                                           |
| <b><sup>a</sup>Na<sup>+</sup></b>                | 0.48                        | I+J+K                                                                                            |
| <b><sup>a</sup>K<sup>+</sup></b>                 | 0.82                        | J+K                                                                                              |
| <b><sup>a</sup>Ca<sup>2+</sup></b>               | 1.38                        | J+K                                                                                              |
| <b><sup>a</sup>Mg<sup>2+</sup></b>               | 1.00                        | J+K                                                                                              |
| <b><sup>a</sup>Cl<sup>-</sup></b>                | 0.64                        | I+J+K                                                                                            |

<sup>\*</sup> I, J, K denotes Aitken, accumulation, and coarse modes in particle phase from CMAQ output.

<sup>\*</sup> Condition: a grid point along the coast of Taichung (24.203° N, 120.5053° E, the second layer, ~ 68.5 m a.s.l) at 8:00 am local time on 3<sup>rd</sup> December 2018 from CMAQ.

<sup>a</sup> The concentration from the control run.

60 <sup>b</sup> The concentration from the NH3\_02x run (NH<sub>3</sub> emission reduced to 0.2x of control run).

<sup>c</sup> dH<sub>2</sub>O<sub>2</sub> is the H<sub>2</sub>O<sub>2</sub> difference concentration (control run – NH3-02x run).

<sup>d</sup> Er ranges from 0.2 to 1.0 at 0.1 intervals

65 **Table S4: Reactions and rate constants used in box model (from Seinfeld and Pandis (2006))**

| <b>Dissolution reaction</b>       |                                                                                                                                                                                                                                                                              | <b>Henry's constant (M atm<sup>-1</sup>)</b>                                                                         |
|-----------------------------------|------------------------------------------------------------------------------------------------------------------------------------------------------------------------------------------------------------------------------------------------------------------------------|----------------------------------------------------------------------------------------------------------------------|
| 1.                                | $\text{CO}_2 + \text{H}_2\text{O} \leftrightarrow \text{CO}_2 \cdot \text{H}_2\text{O}$                                                                                                                                                                                      | $H_{\text{CO}_2} = 0.034$                                                                                            |
| 2.                                | $\text{SO}_2 + \text{H}_2\text{O} \leftrightarrow \text{SO}_2 \cdot \text{H}_2\text{O}$                                                                                                                                                                                      | $H_{\text{SO}_2} = 1.23$                                                                                             |
| 3.                                | $\text{HNO}_3(\text{g}) \leftrightarrow \text{HNO}_3(\text{aq})$                                                                                                                                                                                                             | $H_{\text{HNO}_3} = 2.1 \times 10^5$                                                                                 |
| 4.                                | $\text{NH}_3 + \text{H}_2\text{O} \leftrightarrow \text{NH}_3 \cdot \text{H}_2\text{O}$                                                                                                                                                                                      | $H_{\text{NH}_3} = 62$                                                                                               |
| 5.                                | $\text{O}_3(\text{g}) \leftrightarrow \text{O}_3(\text{aq})$                                                                                                                                                                                                                 | $H_{\text{O}_3} = 1.14 \times 10^{-2}$                                                                               |
| 6.                                | $\text{H}_2\text{O}_2(\text{g}) \leftrightarrow \text{H}_2\text{O}_2(\text{aq})$                                                                                                                                                                                             | $H_{\text{H}_2\text{O}_2} = 1 \times 10^5$                                                                           |
| <b>Dissociation reaction</b>      |                                                                                                                                                                                                                                                                              | <b>Rate constant (M)</b>                                                                                             |
| 7.                                | $\text{CO}_2 \cdot \text{H}_2\text{O} \leftrightarrow \text{HCO}_3^- + \text{H}^+$<br>$\text{HCO}_3^- \leftrightarrow \text{CO}_3^{2-} + \text{H}^+$                                                                                                                         | $k_{c1} = 4.2 \times 10^{-7}$<br>$k_{c2} = 5.61 \times 10^{-11}$                                                     |
| 8.                                | $\text{SO}_2 \cdot \text{H}_2\text{O} \leftrightarrow \text{HSO}_3^- + \text{H}^+$<br>$\text{HSO}_3^- \leftrightarrow \text{SO}_3^{2-} + \text{H}^+$                                                                                                                         | $k_{s1} = 1.3 \times 10^{-2}$<br>$k_{s2} = 6.6 \times 10^{-8}$                                                       |
| 9.                                | $\text{HNO}_3(\text{aq}) \leftrightarrow \text{NO}_3^- + \text{H}^+$                                                                                                                                                                                                         | $k_{a1} = 15.4$                                                                                                      |
| 10.                               | $\text{NH}_3 \cdot \text{H}_2\text{O} \leftrightarrow \text{NH}_4^+ + \text{OH}^-$                                                                                                                                                                                           | $k_{a1} = 1.7 \times 10^{-5}$                                                                                        |
| 11.                               | $\text{H}_2\text{SO}_4 \leftrightarrow \text{HSO}_4^- + \text{H}^+$<br>$\text{HSO}_4^- \leftrightarrow \text{SO}_4^{2-} + \text{H}^+$                                                                                                                                        | as a complete dissociation<br>$k_{a2} = 1.2 \times 10^{-2}$                                                          |
| 12.                               | $\text{H}_2\text{O} \leftrightarrow \text{H}^+ + \text{OH}^-$                                                                                                                                                                                                                |                                                                                                                      |
| <b>Aqueous oxidation reaction</b> |                                                                                                                                                                                                                                                                              | <b>Rate constant (M<sup>-1</sup>s<sup>-1</sup>)</b>                                                                  |
| 13.                               | $\text{SO}_2 + \text{O}_3 + \text{H}_2\text{O} \rightarrow \text{SO}_4^{2-} + \text{O}_2 + 2\text{H}^+$<br>$\text{HSO}_3^- + \text{O}_3 \rightarrow \text{SO}_4^{2-} + \text{O}_2 + \text{H}^+$<br>$\text{SO}_3^{2-} + \text{O}_3 \rightarrow \text{SO}_4^{2-} + \text{O}_2$ | $k_{\text{O}_3,1} = 2.4 \times 10^4$<br>$k_{\text{O}_3,2} = 3.7 \times 10^5$<br>$k_{\text{O}_3,2} = 1.5 \times 10^9$ |
| 14.                               | $\text{HSO}_3^- + \text{H}_2\text{O}_2 + \text{H}^+ \rightarrow \text{SO}_4^{2-} + 2\text{H}^+ + \text{H}_2\text{O}$                                                                                                                                                         | $k_{\text{H}_2\text{O}_2} = 7.45 \times 10^7$                                                                        |
| 15.                               | $\text{S(IV)} + \frac{1}{2} \text{O}_2 \xrightarrow{\text{Mn}^{2+}, \text{Fe}^{3+}} \text{S(VI)}$                                                                                                                                                                            | $k_{\text{Mn}} = 750; k_{\text{Fe}} = 2600;$<br>$k_{\text{Mn,Fe}} = 1.0 \times 10^{10}$                              |

**Table S5: Statistic of air temperature, relative humidity, CO, and O<sub>3</sub> of MOENV observation and model simulation.**

|                               | <b>Tamsui</b> | <b>Shalu</b> | <b>Taixi</b> | <b>Qianzhen</b> |
|-------------------------------|---------------|--------------|--------------|-----------------|
| <b>Temperature (degree C)</b> |               |              |              |                 |
| Mean value of MOENV           | 18.61         | 20.19        | 20.00        | 23.31           |
| Mean value of WRF             | 18.48         | 19.50        | 19.05        | 22.39           |
| Correlation coefficient       | 0.87          | 0.93         | 0.84         | 0.93            |
| Mean bias error               | -0.18         | -0.69        | -0.95        | -0.92           |
| Mean absolute error           | 1.33          | 1.10         | 1.47         | 1.34            |
| <b>RH (%)</b>                 |               |              |              |                 |
| Mean value of MOENV           | 85.12         | 74.97        | 82.85        | 69.49           |
| Mean value of WRF             | 80.42         | 76.49        | 80.71        | 69.95           |
| Correlation coefficient       | 0.71          | 0.84         | 0.58         | 0.86            |
| Mean bias error               | -4.23         | 1.52         | -2.14        | 0.46            |
| Mean absolute error           | 7.31          | 6.23         | 6.75         | 4.78            |
| <b>CO (ppbv)</b>              |               |              |              |                 |
| Mean value of MOENV           | 331.98        | 355.42       | 258.98       | 644.20          |
| Mean value of CMAQ            | 137.84        | 143.09       | 129.03       | 266.13          |
| Correlation coefficient       | 0.59          | 0.53         | 0.46         | 0.62            |
| Mean bias error               | -194.05       | -212.32      | -129.94      | -377.72         |
| Mean absolute error           | 196.13        | 212.32       | 130.95       | 378.77          |
| <b>O<sub>3</sub> (ppbv)</b>   |               |              |              |                 |
| Mean value of MOENV           | 35.05         | 31.43        | 37.74        | 26.77           |
| Mean value of CMAQ            | 47.13         | 42.73        | 42.57        | 32.51           |
| Correlation coefficient       | 0.66          | 0.73         | 0.58         | 0.84            |
| Mean bias error               | 12.07         | 11.29        | 4.67         | 5.76            |
| Mean absolute error           | 13.0          | 12.93        | 8.94         | 11.05           |

70 Correlation coefficient = 
$$\frac{\sum_{i=1}^n (m_i - \bar{m})(o_i - \bar{o})}{\sqrt{\sum_{i=1}^n (m_i - \bar{m})^2} \sqrt{\sum_{i=1}^n (o_i - \bar{o})^2}}$$

Mean bias error =  $\overline{(m_i - o_i)}$ ; Mean absolute error =  $\overline{|(m_i - o_i)|}$



where  $m_i$  and  $o_i$  are the wind speed or concentrations of model and observation at time  $i$ , respectively, and  $\bar{m}$  and  $\bar{o}$  are their average over December 2018.

75 **Table S6: Mean contribution of sulfate formation in each air pollution zone (altitude below 200m a.s.l.).**

|                   | <b>Gas phase processes</b> | <b>Aqueous phase processes</b> | <b>Other processes</b> |
|-------------------|----------------------------|--------------------------------|------------------------|
| northern Taiwan   | 8.4 %                      | 21.5 %                         | 70.1 %                 |
| Chu-Miao area     | 11.2 %                     | 28.5 %                         | 60.3 %                 |
| central Taiwan    | 13.2 %                     | 30.5 %                         | 56.3 %                 |
| Yun-Chia-Nan area | 16.5 %                     | 27.6 %                         | 55.9 %                 |
| Kao-Ping area     | 19.8 %                     | 23.7 %                         | 56.6 %                 |

**Table S7: Statistics of PM<sub>2.5</sub> sensitivity coefficient of NO<sub>x</sub> ( $S_{NO_x,PM_{2.5}}$ ) and NH<sub>3</sub> ( $S_{NH_3,PM_{2.5}}$ ) in each air pollution zone (altitude below 200m a.s.l.) under the current condition (at NO<sub>x</sub> emission ratio of 0.9).**

80

|                   | $S_{NO_x,PM_{2.5}}$ |      |      | $S_{NH_3,PM_{2.5}}$ |      |      |
|-------------------|---------------------|------|------|---------------------|------|------|
|                   | Mean                | Q1   | Q3   | Mean                | Q1   | Q3   |
| Northern Taiwan   | 0.15                | 0.12 | 0.19 | 0.12                | 0.11 | 0.14 |
| Chu-Miao area     | 0.20                | 0.18 | 0.22 | 0.17                | 0.16 | 0.19 |
| Central Taiwan    | 0.23                | 0.20 | 0.25 | 0.19                | 0.18 | 0.21 |
| Yun-Chia-Nan area | 0.33                | 0.30 | 0.36 | 0.19                | 0.18 | 0.20 |
| Kao-Ping area     | 0.34                | 0.31 | 0.41 | 0.19                | 0.17 | 0.21 |

Mean: Arithmetic mean; Q1: 25th percentile; Q3: 75th percentile.

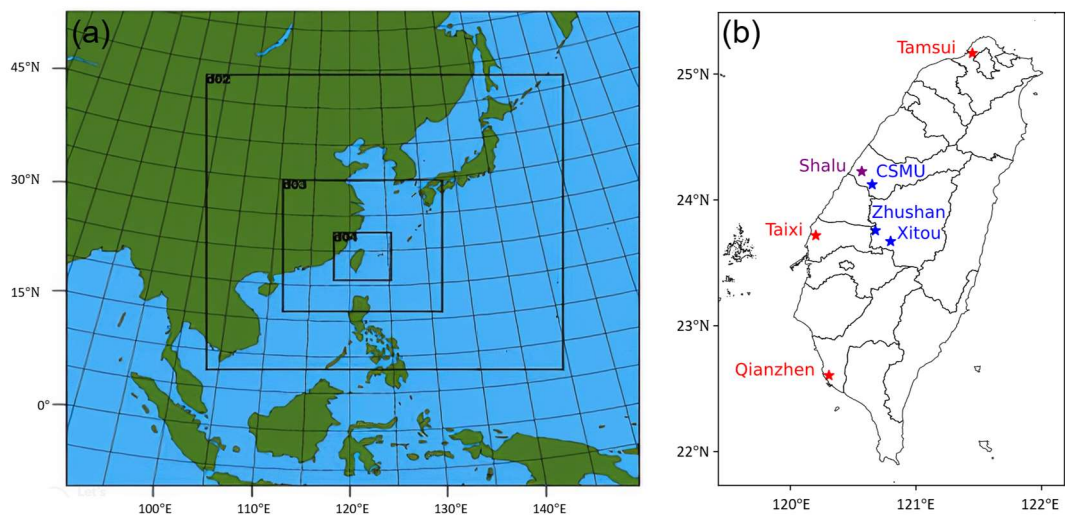

85 **Figure S1: (a) WPS domain configuration. (b) CMAQ d04 domain. Red points are MOENV stations. Blue points are PM components measurement stations. Purple point is Shalu station, having both EPA data and PM components data.**

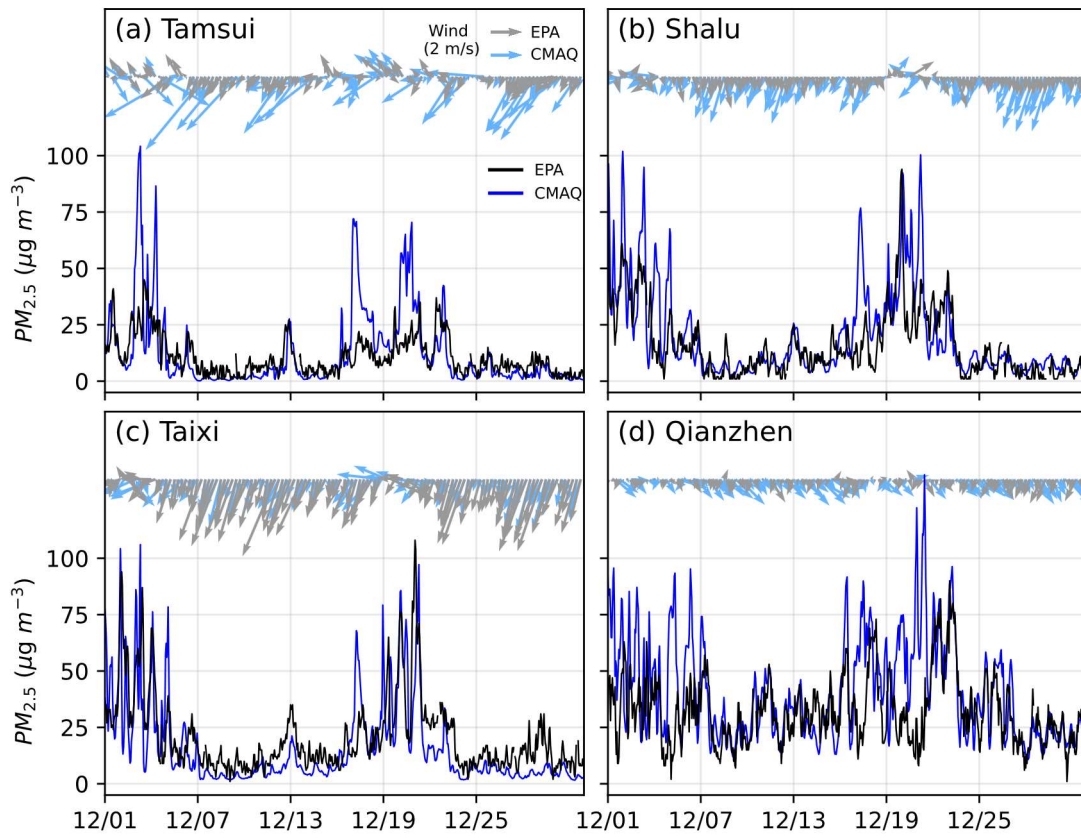

**Figure S2: The comparison of wind field and  $PM_{2.5}$  between MOENV ground observation and CMAQ surface layer.**

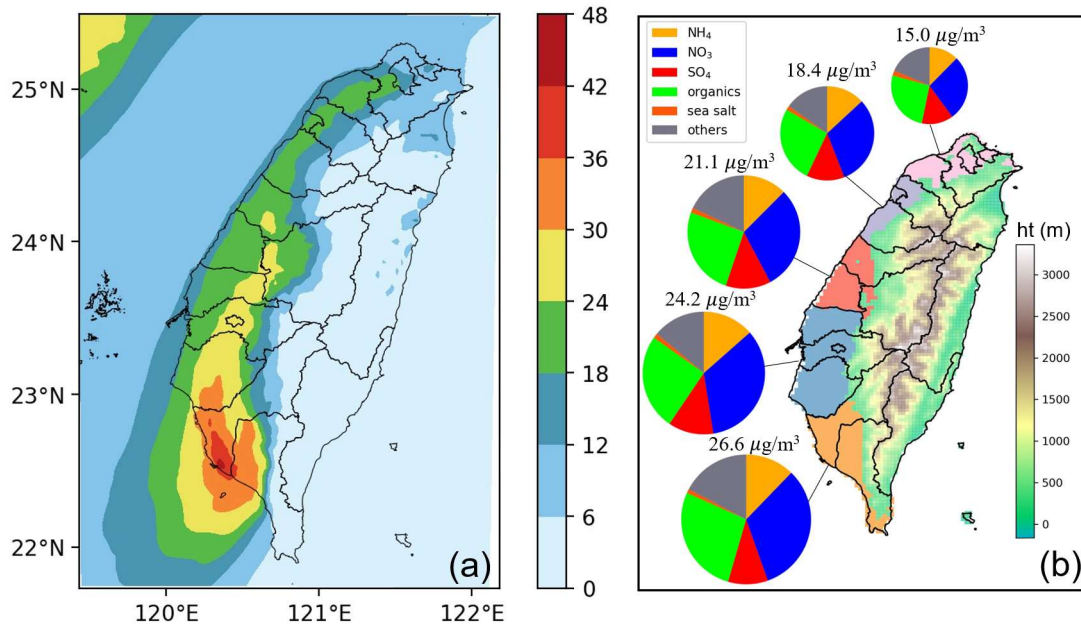

90

**Figure S3: (a) Average PM<sub>2.5</sub> concentration ( $\mu\text{g m}^{-3}$ ). (b) The composition fraction and PM<sub>2.5</sub> concentrations for different regions (different shading colors) at less than 200 m altitude above sea level. (From north to south, the regions are northern Taiwan (pink), Chu-Miao (purple), central Taiwan (red), Yun-Chia-Nan (blue), and Kao-Ping (orange)). The component is shown in legend. 95 The colorbar is the height above sea level. Conditions: average data from 1-31 December 2018 for the surface layer.**

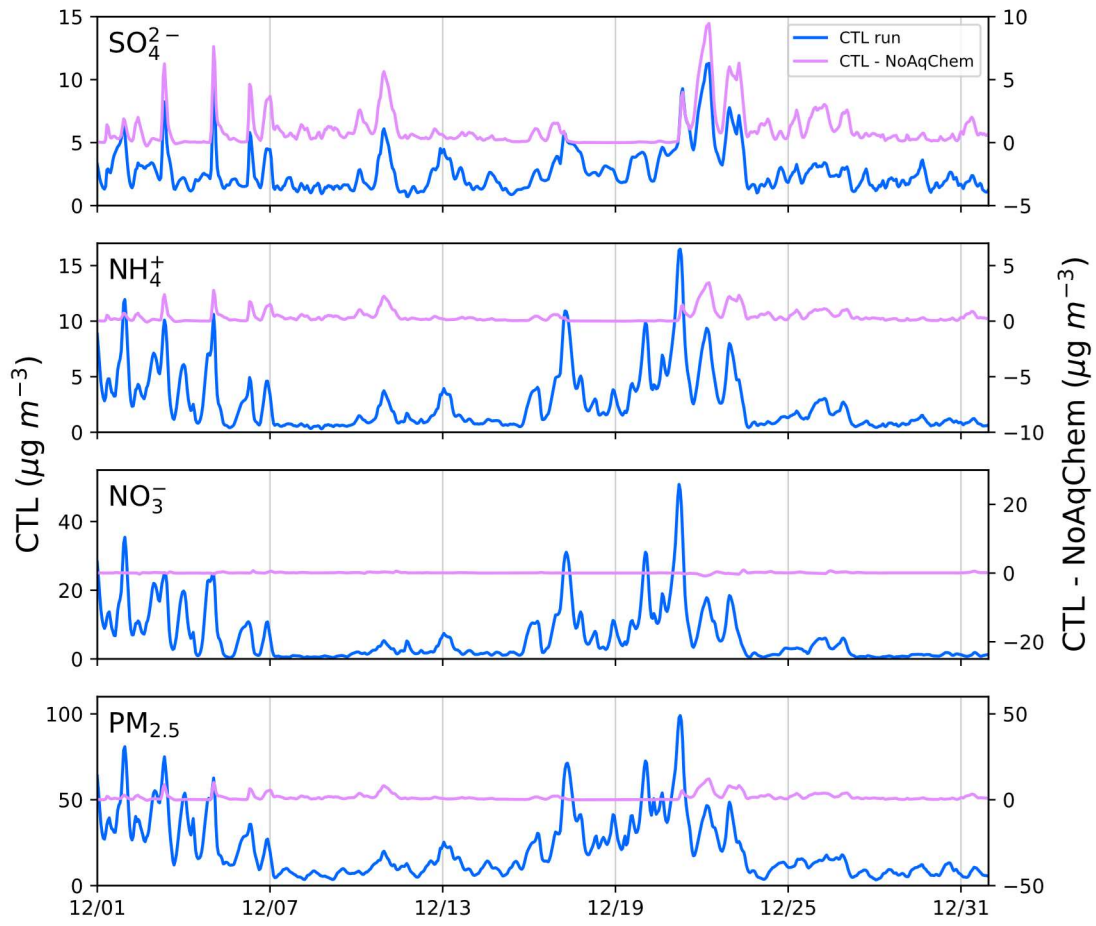

100 **Figure S4: Sulfate, ammonium, nitrate, and  $\text{PM}_{2.5}$  concentrations of control run (blue line, left y-axis) and difference between control and NoAqChem run (pink line, right y-axis). The left and right y-axes have the same scale but different ranges. Conditions: average data of central Taiwan for the surface layer.**

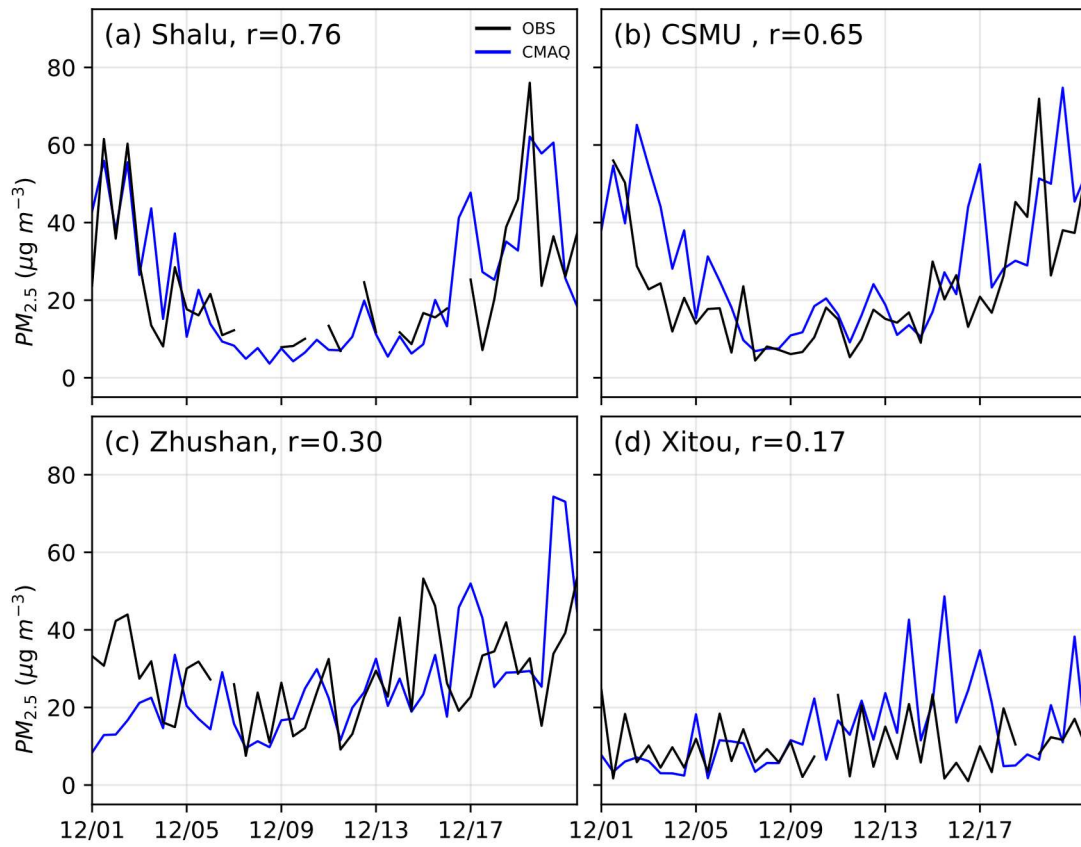

**Figure S5: The comparison of PM<sub>2.5</sub> between observation and CMAQ surface layer in central Taiwan (r: correlation coefficient).**



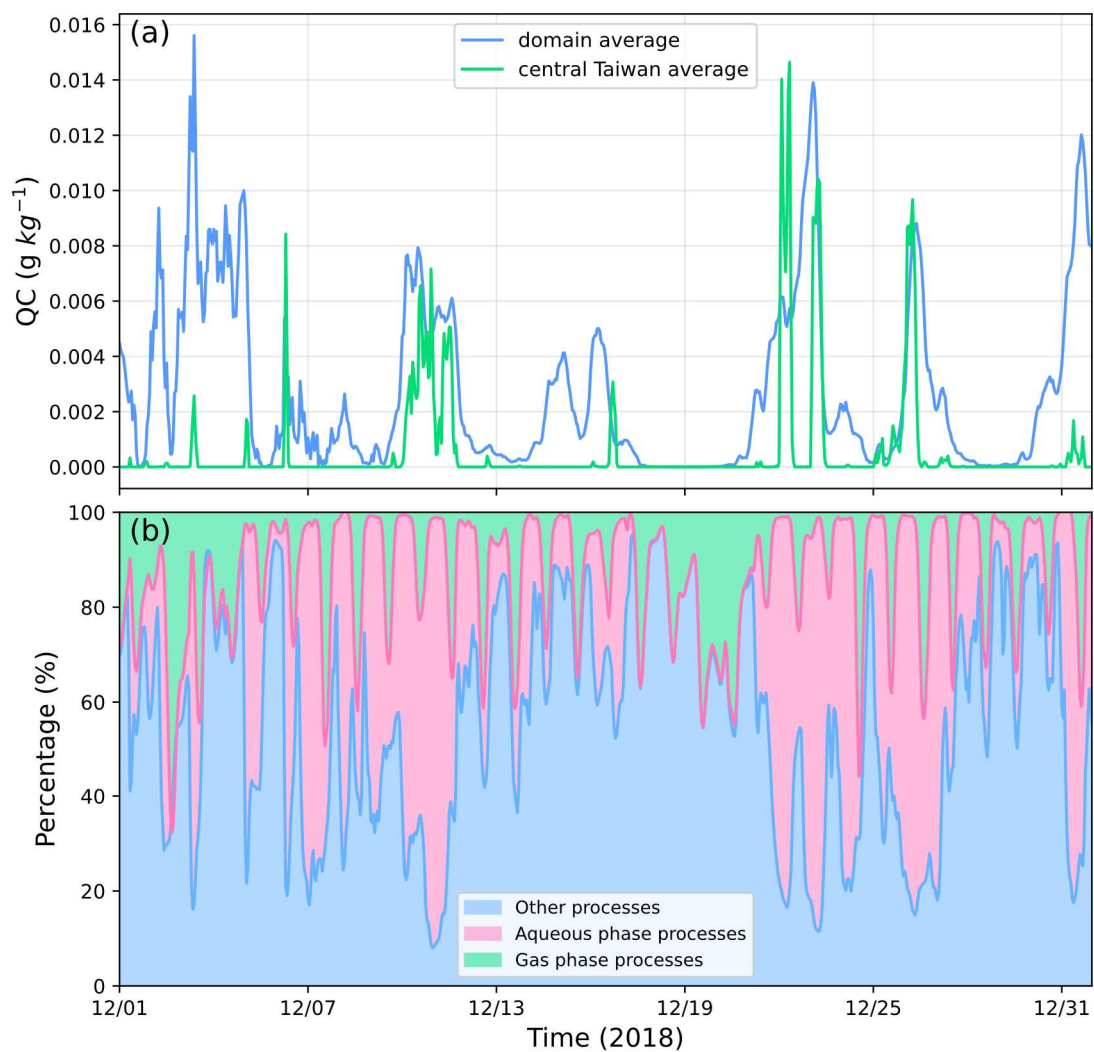

105

**Figure S6: (a) Average cloud water within the planetary boundary layers. (b) Surface layer average sulfate source contributions in central Taiwan.**

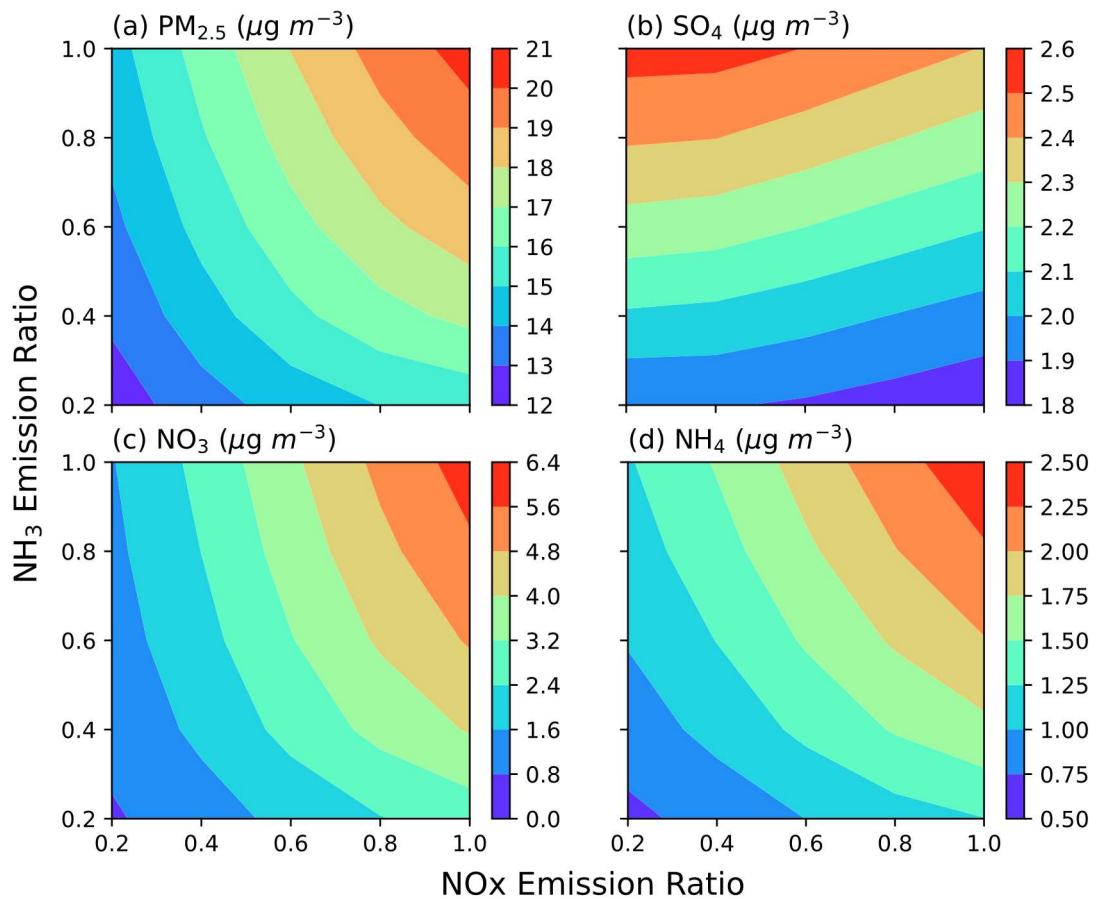

110 **Figure S7: (a)  $\text{PM}_{2.5}$ , (b) sulfate, (c) nitrate, and (d) ammonium average concentration as a function of NOx (x-axis) and  $\text{NH}_3$  (y-axis) emission ratios. Conditions: average data of central Taiwan from 1-14 December 2018 for the surface layer.**

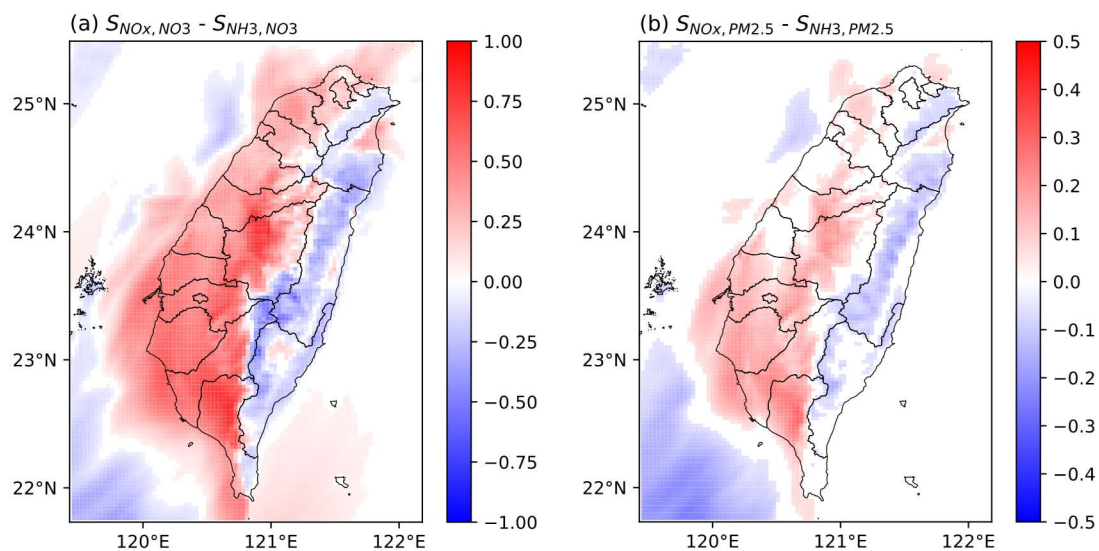

**Figure S8: The difference of (a) nitrate and (b) PM<sub>2.5</sub> sensitivity coefficient map between NO<sub>x</sub> and NH<sub>3</sub> under the current condition (at NO<sub>x</sub> emission ratio of 0.9). Red regimes represent NO<sub>x</sub>-sensitive, blue regimes represent NH<sub>3</sub>-sensitive, and white regimes represent neutral with values between -0.05 and 0.05. Conditions: average data from 1-31 December 2018 for the surface layer.**

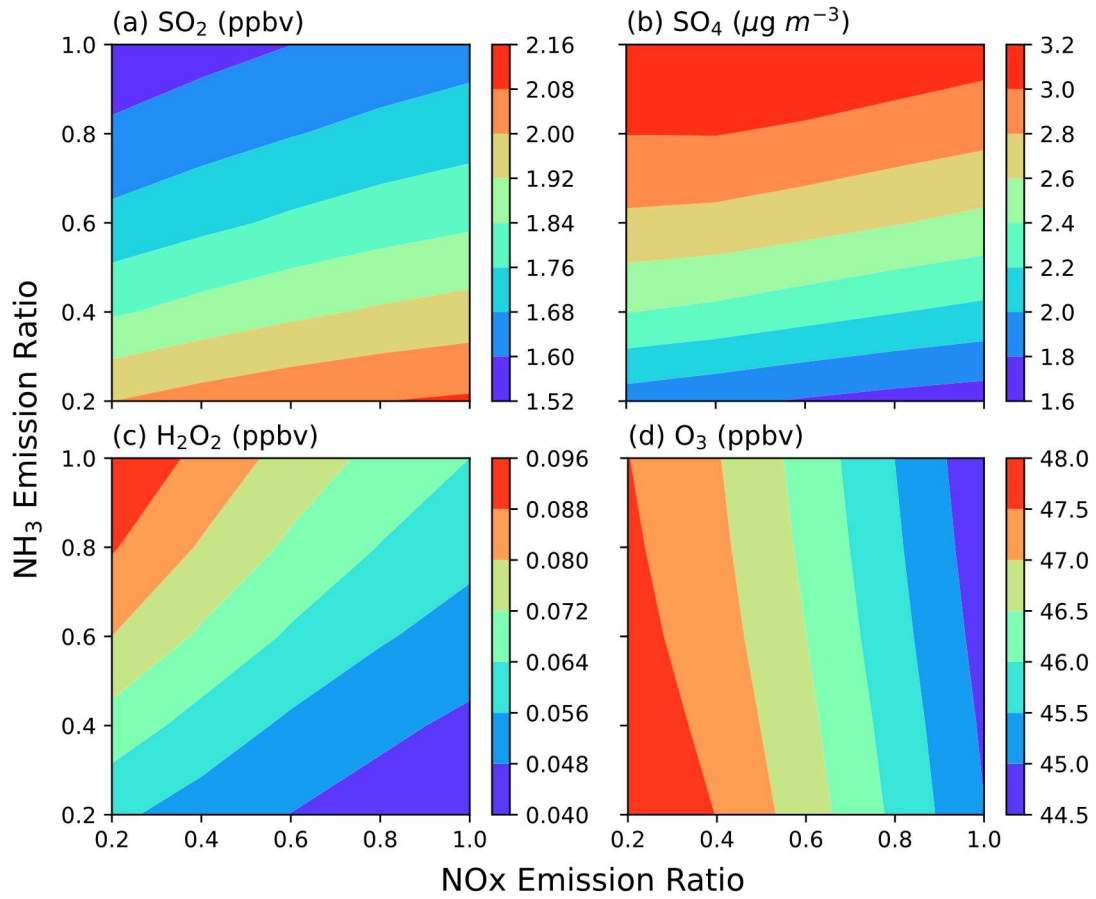

120 **Figure S9: Average in-cloud (a) SO<sub>2</sub>, (b) sulfate, (c) H<sub>2</sub>O<sub>2</sub>, and (d) ozone concentration as a function of NOx (x-axis) and NH<sub>3</sub> (y-axis) emission ratios. Conditions: average data of western Taiwan land regions in domain 4 from 1-14 December 2018 for the cloud grid points.**

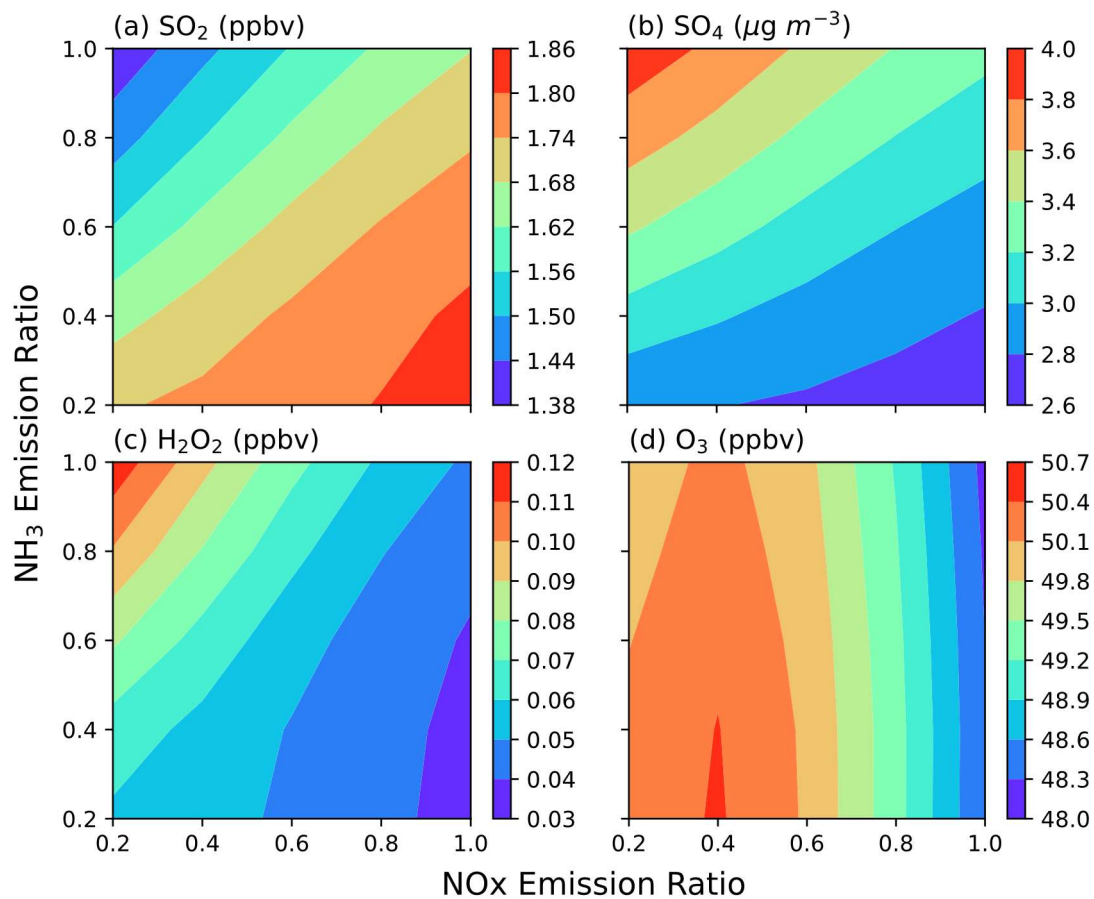

**Figure S10: Average in-cloud (a)  $\text{SO}_2$ , (b) sulfate, (c)  $\text{H}_2\text{O}_2$ , and (d) ozone concentration as a function of  $\text{NO}_x$  (x-axis) and  $\text{NH}_3$  (y-axis) emission ratios. Conditions: average data of sea regions west of  $121^\circ\text{E}$  in domain 4 from 1-14 December 2018 for the cloud grid points.**

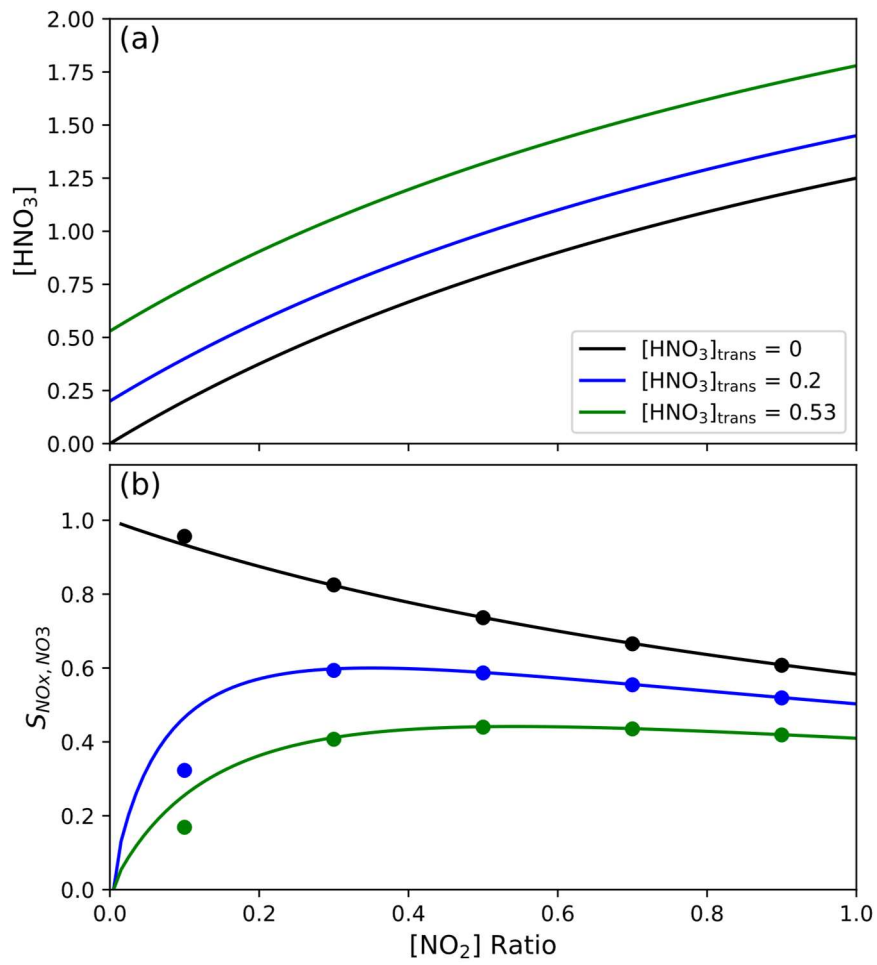

125

**Figure S11: (a) HNO<sub>3</sub> concentration and (b) nitrate sensitivity coefficient of NO<sub>x</sub> ( $S_{NO_x, NO_3}$ ) as a function of NO<sub>2</sub> ratio.**

## Reference

- 130 Seinfeld, J. H., and Pandis, S. N.: Atmospheric Chemistry and Physics: From Air Pollution to Climate Change, Wiley, 2006.
